# Supplementary material for: Ataluren for the Treatment of Usher Syndrome 2A Caused by Nonsense Mutations
Source: PubMed Central journal article supplement (PMC6940777; doi:10.3390/ijms20246274), 2019-12-12
Supplement: ijms-20-06274-s001.pdf [file ijms-20-06274-s001.pdf]

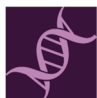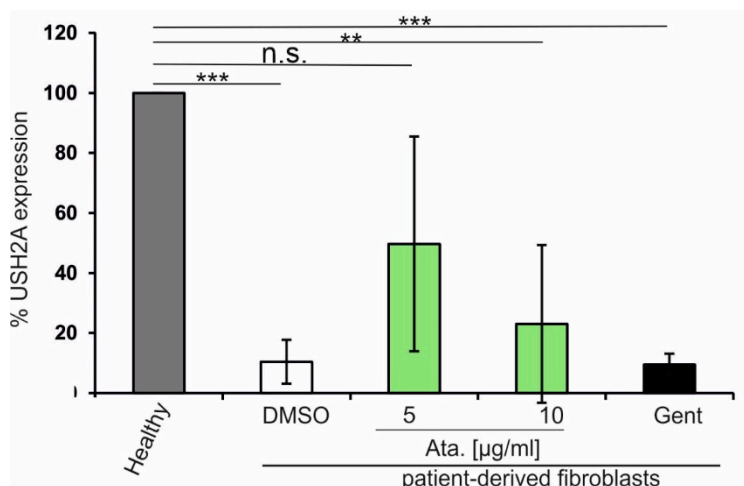

**Figure S1.** USH2A protein levels of untreated and TRIDS-treated patient-derived cells relative to healthy donor cells.

We calculated the relative USH2A expression levels in patient-derived cells versus healthy control fibroblasts. The band intensity for USH2A (Figure 3A) of control fibroblasts was set to 100%. A significant decrease of USH2A protein levels were detected in patient-derived fibroblasts treated with DMSO, 10  $\mu\text{g}/\mu\text{L}$  Ataluren-treated or Gentamicin (Genta) compared to healthy control cells. No significant differences in protein levels were observed between healthy control cells and patient-derived cells treated with 5  $\mu\text{g}/\text{ml}$  Ataluren.  $p < 0.001$ (\*\*\*),  $p < 0.01$  (\*\*).

**Table S1.** Summary of the number of ciliated cells in patient-derived cells and healthy donor cells following TRID-treatment.

| Cell Line                             | Treatment  | Total Number | Ciliated Cells | Unciliated Cells |
|---------------------------------------|------------|--------------|----------------|------------------|
| <b>Healthy donor</b><br>( $n = 4$ )   | Untr.      | 198          | 149            | 49               |
|                                       | DMSO       | 221          | 153            | 68               |
|                                       | Gentamicin | 205          | 133            | 72               |
|                                       | Ataluren   | 180          | 133            | 47               |
| <b>Patient-derived</b><br>( $n = 4$ ) | Untr.      | 97           | 51             | 46               |
|                                       | DMSO       | 100          | 50             | 50               |
|                                       | Gentamicin | 93           | 35             | 58               |
|                                       | Ataluren   | 119          | 82             | 37               |
